# Supplementary material for: What quantum chemical simulations tell us about the infrared spectra, structure and interionic interactions of a bulk ionic liquid
Source: Royal Society of Chemistry journal article supplement (doi:10.1039/d1cp05745f), 2022-01-01
Supplement: d1cp05745f1.pdf [file d1cp05745f1.pdf]

# What Quantum Chemical Simulations Tell Us about the Infrared Spectra, Structure and Hydrogen Bonding of a Bulk Ionic Liquid

Sergey A. Katsyuba,<sup>a,\*</sup> Elena E. Zvereva,<sup>a,b</sup>

<sup>a</sup> *Arbuzov Institute of Organic and Physical Chemistry, FRC Kazan Scientific Centre of RAS, Arbuzov st. 8, 420088 Kazan, Russia.*

<sup>b</sup> *IFP Energies Nouvelles, 1 et 4 avenue de Bois-Préau, 92852 Rueil-Malmaison Cedex – France*

## Supporting information

Contents:

|                                                                                                                |    |
|----------------------------------------------------------------------------------------------------------------|----|
| Figure S1. B97-3c simulated IR spectra of clusters ([Emim][BF <sub>4</sub> ]) <sub>8</sub>                     | S2 |
| Figure S2. The H...F distances computed for the cluster ([Emim][BF <sub>4</sub> ]) <sub>8</sub>                | S2 |
| Table S1. Computed frequencies of gaseous [Emim] <sup>+</sup> cation and [BF <sub>4</sub> ] <sup>-</sup> anion | S3 |
| Cartesian coordinates of species indicated in the legend to Figure 1                                           | S4 |
| References                                                                                                     | S9 |

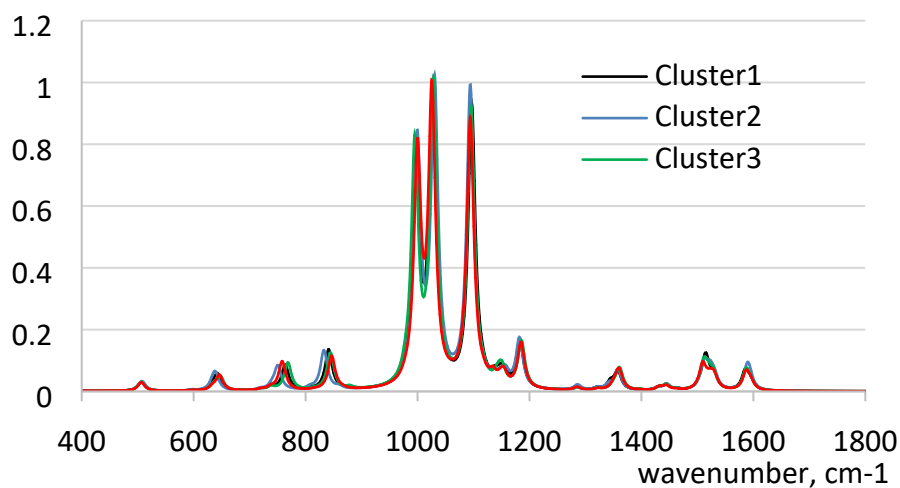

**Figure S1.** B97-3c simulated IR spectra for clusters  $([\text{Emim}][\text{BF}_4])_8$  of lowest free energy (Cluster 1), of the second-lowest free energy (Cluster 2) of the third-lowest free energy (Cluster 3) and of the fourth-lowest free energy (Cluster 4). The spectra are normalized so that the maximum intensity is equal to unity.

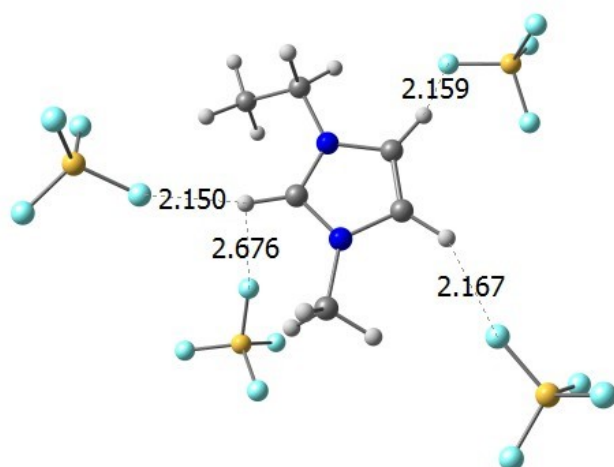

**Figure S2:** The  $\text{H}\cdots\text{F}$  distances (in Å) computed for  $[\text{BF}_4]^-$  anions closest to the ring protons of the solvated  $[\text{Emim}]^+$  cation in the cluster  $([\text{Emim}][\text{BF}_4])_8$  shown in Fig. 1, B (main text).

**Table S1.** Fundamental frequencies ( $\text{cm}^{-1}$ ) of gaseous  $[\text{Emim}]^+$  cation and  $[\text{BF}_4]^-$  anion, and the corresponding B97-3c and B3LYP/6-31+G\*\* computed values.

| Assignment                          | B97-3c <sup>a</sup> | CIVP experiment <sup>b</sup> | B3LYP/6-31+G(d,p) <sup>c</sup> |
|-------------------------------------|---------------------|------------------------------|--------------------------------|
| <b><math>[\text{BF}_4]^-</math></b> |                     |                              |                                |
| $\nu_3$ asym. str.                  | 1045                | 1068                         | 1052                           |
| <b><math>[\text{Emim}]^+</math></b> |                     |                              |                                |
| C2H oop bend                        | 804                 | 821                          | 805                            |
| C4H/C5H ip bend                     | 1099                | 1105                         | 1099                           |
| N1C2N3 ring sym. str.               | 1109                |                              |                                |
| C2H ip bend                         | 1143                | 1158                         | 1146                           |
| Me $\text{CH}_3$ bend               | 1457                | 1450                         | 1452                           |
| Et $\text{CH}_3$ bend               | 1468                | 1471                         | 1467                           |
| N1C2N3 ring asym. str.              | 1548                | 1556                         | 1555                           |
| C2N3/C4C5 ring asym. str.           | 1557                |                              | 1563                           |
| Et $\text{CH}_3$ sym. str.          | 2958                | 2978                         |                                |
| Me $\text{CH}_3$ sym. str.          | 2981                | 2991                         | 2972                           |
| Et $\text{CH}_2$ sym. str.          | 2984                |                              | 2981                           |
| Et $\text{CH}_3$ asym. str.         | 3037                | 3008                         | 3029                           |
| Et $\text{CH}_2$ asym. str.         | 3042                |                              | 3039                           |
| C2H str.                            | 3174                | 3132                         | 3178                           |
| C4H/C5H asym. str.                  | 3168                | 3163                         | 3174                           |
| C4H/C5H sym. str.                   | 3185                | 3180                         | 3192                           |

<sup>a</sup> Harmonic frequencies without scaling for the range  $\nu < 1100 \text{ cm}^{-1}$ , and with a scaling factor of 0.979 for the range  $\nu > 1100 \text{ cm}^{-1}$ ; <sup>b</sup> Cryogenic Ion Vibrational Predissociation spectroscopy data from Ref.<sup>1</sup>; <sup>c</sup> Harmonic frequencies scaled by 0.97 for the range  $\nu < 1800 \text{ cm}^{-1}$ , and with a scaling factor of 0.9639 for the range  $\nu > 2900 \text{ cm}^{-1}$  (from Ref.<sup>1</sup>).

### Cartesian coordinates of species shown in Fig. 1 (main text)

Ion pair

|   |              |              |              |
|---|--------------|--------------|--------------|
| 5 | 2.654574515  | -0.527260468 | 0.159846778  |
| 9 | 3.938568335  | -0.541514688 | 0.655340090  |
| 9 | 1.692265714  | -0.420391959 | 1.205856248  |
| 9 | 2.450825642  | 0.571661758  | -0.730792331 |
| 9 | 2.366918986  | -1.723453405 | -0.573758485 |
| 6 | -0.314977792 | -0.482613451 | -0.698767027 |
| 7 | -0.919157026 | 0.669800806  | -0.414933109 |
| 7 | -0.976310910 | -1.466075191 | -0.089044529 |
| 6 | -1.993975128 | 0.416641463  | 0.411051144  |
| 6 | -2.031713435 | -0.923597924 | 0.611958954  |
| 1 | 0.591271548  | -0.594564438 | -1.263438781 |
| 6 | -0.399410816 | 1.997202151  | -0.772248664 |
| 6 | -0.569567639 | -2.866426409 | -0.093897857 |
| 1 | -2.625634171 | 1.200426291  | 0.782693951  |
| 1 | -2.702708097 | -1.530523710 | 1.189436682  |
| 6 | 0.154051662  | 2.721007326  | 0.436004884  |
| 1 | 0.384816981  | 1.833172471  | -1.502933842 |
| 1 | -1.209816923 | 2.548100454  | -1.247281550 |
| 1 | 0.481976924  | -2.912090326 | -0.351893716 |
| 1 | -0.703535702 | -3.271066227 | 0.903485670  |
| 1 | -1.168017265 | -3.430303118 | -0.804675259 |
| 1 | 0.576811906  | 3.671541193  | 0.117394163  |
| 1 | 0.940857416  | 2.131706096  | 0.895497353  |
| 1 | -0.618114730 | 2.928621305  | 1.175099223  |

Cluster ([Emim][BF<sub>4</sub>])<sub>8</sub>

|   |              |              |              |
|---|--------------|--------------|--------------|
| 5 | -3.893410777 | 1.405345392  | -2.449122533 |
| 9 | -4.575970824 | 1.841000198  | -1.288731353 |
| 9 | -4.375093088 | 0.123833091  | -2.817090484 |
| 9 | -4.077470647 | 2.308053028  | -3.494353885 |
| 9 | -2.503522584 | 1.302563898  | -2.145565031 |
| 6 | 0.003085315  | 0.297654074  | -0.466889451 |
| 7 | -0.169652612 | -0.322399657 | 0.703480721  |
| 7 | 1.261856319  | 0.089803083  | -0.859984056 |
| 6 | 1.004896054  | -0.952621174 | 1.056301782  |
| 6 | 1.901933699  | -0.694134434 | 0.073545287  |
| 1 | -0.738252471 | 0.861752487  | -1.000111445 |
| 6 | -1.416761301 | -0.401552963 | 1.477636873  |
| 6 | 1.852376483  | 0.576275204  | -2.101501336 |
| 1 | 1.093273952  | -1.475140998 | 1.989009546  |
| 1 | 2.933898620  | -0.960395915 | -0.039825187 |
| 6 | -2.273517497 | 0.834765034  | 1.366167558  |
| 1 | -1.950026793 | -1.280109272 | 1.125456883  |
| 1 | -1.123708142 | -0.588889419 | 2.505185074  |
| 1 | 1.585184026  | 1.614015819  | -2.246934469 |
| 1 | 2.928022027  | 0.490189681  | -2.020600406 |
| 1 | 1.504766039  | -0.020307981 | -2.935857407 |

|   |              |              |              |
|---|--------------|--------------|--------------|
| 1 | -3.113063204 | 0.728485282  | 2.048437384  |
| 1 | -2.669825393 | 0.968914573  | 0.364378462  |
| 1 | -1.724909574 | 1.728572317  | 1.651752275  |
| 5 | 1.118693659  | -0.781080405 | -6.530226358 |
| 9 | 0.146776131  | -1.796021635 | -6.291956258 |
| 9 | 1.516293668  | -0.263601063 | -5.252848942 |
| 9 | 2.237819809  | -1.349284762 | -7.155507043 |
| 9 | 0.561384649  | 0.242658837  | -7.292100581 |
| 6 | -1.586090284 | 0.212205363  | -4.784198463 |
| 7 | -2.609806744 | -0.321571526 | -5.445779315 |
| 7 | -1.415406713 | 1.462679609  | -5.210985169 |
| 6 | -3.105751244 | 0.612968439  | -6.326585580 |
| 6 | -2.355211426 | 1.730762872  | -6.176391287 |
| 1 | -0.997832374 | -0.293868240 | -4.045488709 |
| 6 | -3.128937981 | -1.673778733 | -5.234820820 |
| 6 | -0.407919860 | 2.389108981  | -4.709391565 |
| 1 | -3.948953851 | 0.413407073  | -6.957815323 |
| 1 | -2.413351516 | 2.687587979  | -6.657187786 |
| 6 | -3.089414696 | -2.506252197 | -6.497967729 |
| 1 | -2.523699848 | -2.123546082 | -4.454632217 |
| 1 | -4.138131199 | -1.570570664 | -4.841871740 |
| 1 | -0.479832143 | 3.314226675  | -5.267419674 |
| 1 | -0.593027474 | 2.593666235  | -3.661211669 |
| 1 | 0.576025729  | 1.959153868  | -4.853156619 |
| 1 | -3.419486602 | -3.517534738 | -6.266691754 |
| 1 | -2.080000653 | -2.547094113 | -6.895372535 |
| 1 | -3.751325135 | -2.113390605 | -7.267845536 |
| 5 | -0.491927108 | 4.332560657  | 4.163490124  |
| 9 | 0.600074300  | 4.816072095  | 3.416334637  |
| 9 | -0.034027838 | 3.550354697  | 5.238419549  |
| 9 | -1.274033423 | 5.404065638  | 4.639973405  |
| 9 | -1.299860824 | 3.519297771  | 3.307329802  |
| 6 | -2.134060977 | 1.599730828  | 5.703281267  |
| 7 | -1.566225134 | 1.052456849  | 6.773211538  |
| 7 | -3.035826466 | 2.490553958  | 6.110138861  |
| 6 | -2.125931412 | 1.607441147  | 7.902608611  |
| 6 | -3.047830889 | 2.509132694  | 7.486312706  |
| 1 | -1.907900062 | 1.369675840  | 4.683315731  |
| 6 | -0.548692925 | -0.004619818 | 6.751627166  |
| 6 | -3.932463989 | 3.231954700  | 5.235974258  |
| 1 | -1.817571971 | 1.320157010  | 8.889127583  |
| 1 | -3.704428193 | 3.153433919  | 8.038424000  |
| 6 | -1.092782907 | -1.330283107 | 7.235472409  |
| 1 | -0.192992271 | -0.093713264 | 5.732549558  |
| 1 | 0.287431624  | 0.335785227  | 7.358408539  |
| 1 | -4.840103182 | 2.655995679  | 5.082054778  |
| 1 | -4.156602712 | 4.186736547  | 5.698514861  |
| 1 | -3.429539420 | 3.411185161  | 4.294246419  |
| 1 | -0.302070736 | -2.071839475 | 7.161236704  |
| 1 | -1.930327101 | -1.644703687 | 6.620238154  |
| 1 | -1.422324938 | -1.281760395 | 8.272224447  |
| 5 | -0.493703164 | -3.399807299 | -2.066704847 |

|   |              |              |              |
|---|--------------|--------------|--------------|
| 9 | -0.706601363 | -3.224013480 | -0.679895074 |
| 9 | 0.467276719  | -4.425582630 | -2.261116742 |
| 9 | -1.698959664 | -3.751162493 | -2.692785722 |
| 9 | 0.002055795  | -2.197292970 | -2.625548503 |
| 6 | 2.287069970  | -3.147225993 | -4.677670807 |
| 7 | 1.961467785  | -4.183365259 | -5.449158906 |
| 7 | 3.573985954  | -2.862591017 | -4.878040269 |
| 6 | 3.069248058  | -4.563241360 | -6.174475824 |
| 6 | 4.078792876  | -3.731553433 | -5.818382287 |
| 1 | 1.611437858  | -2.619388308 | -4.032505986 |
| 6 | 0.619116230  | -4.761529785 | -5.560083157 |
| 6 | 4.275491573  | -1.704186305 | -4.334300523 |
| 1 | 3.040017084  | -5.369111840 | -6.881722387 |
| 1 | 5.094694436  | -3.668050893 | -6.157834639 |
| 6 | 0.583023082  | -6.216059641 | -5.148743823 |
| 1 | -0.030618143 | -4.163465898 | -4.933801401 |
| 1 | 0.298350895  | -4.616281531 | -6.588888228 |
| 1 | 3.880939451  | -1.470715478 | -3.354957697 |
| 1 | 5.328104043  | -1.934515693 | -4.232018292 |
| 1 | 4.127416365  | -0.858832688 | -4.997043136 |
| 1 | -0.436514402 | -6.585155777 | -5.238849505 |
| 1 | 0.888640311  | -6.329703757 | -4.112653314 |
| 1 | 1.217723857  | -6.838474460 | -5.777844484 |
| 5 | -4.503811014 | -0.695834040 | 4.747163469  |
| 9 | -4.511486470 | -0.188184997 | 6.045456621  |
| 9 | -3.168205230 | -0.943198533 | 4.324910918  |
| 9 | -5.236379650 | -1.906428250 | 4.682772690  |
| 9 | -5.081924606 | 0.243246996  | 3.850148262  |
| 6 | -5.019145287 | -2.210697617 | 1.719266798  |
| 7 | -4.154551092 | -3.156120208 | 1.342813755  |
| 7 | -5.218387475 | -1.396570834 | 0.681950673  |
| 6 | -3.792045610 | -2.936512724 | 0.028690212  |
| 6 | -4.461963608 | -1.831817121 | -0.387265452 |
| 1 | -5.431167853 | -2.104055564 | 2.708197051  |
| 6 | -3.612665297 | -4.194082781 | 2.227953235  |
| 6 | -6.120108878 | -0.248560364 | 0.680300079  |
| 1 | -3.071841439 | -3.545008758 | -0.483300037 |
| 1 | -4.448851797 | -1.301746579 | -1.323781440 |
| 6 | -2.207584049 | -3.877189007 | 2.693139583  |
| 1 | -4.291782771 | -4.270842307 | 3.072034795  |
| 1 | -3.652098718 | -5.131868699 | 1.677188682  |
| 1 | -6.206561814 | 0.122145682  | 1.694606361  |
| 1 | -5.704767017 | 0.518124197  | 0.037878952  |
| 1 | -7.094898346 | -0.549878737 | 0.305591786  |
| 1 | -1.837481900 | -4.696030172 | 3.306728054  |
| 1 | -2.194892733 | -2.975609461 | 3.296712533  |
| 1 | -1.532897286 | -3.752594986 | 1.850775303  |
| 5 | 6.198215128  | -0.686973423 | -1.482215568 |
| 9 | 6.556719903  | -2.002047552 | -1.853780067 |
| 9 | 6.346339741  | 0.196179177  | -2.546350529 |
| 9 | 4.812595479  | -0.707159397 | -1.089911269 |
| 9 | 6.956549701  | -0.278626395 | -0.366214199 |

|   |              |              |              |
|---|--------------|--------------|--------------|
| 6 | 2.904757903  | 2.554677948  | 1.126765554  |
| 7 | 4.078829490  | 2.283806761  | 0.548219851  |
| 7 | 2.806562148  | 1.811018423  | 2.230795113  |
| 6 | 4.750737226  | 1.353255697  | 1.310930339  |
| 6 | 3.950490979  | 1.053694658  | 2.365295099  |
| 1 | 2.174101629  | 3.253306271  | 0.762110665  |
| 6 | 4.596353944  | 2.903633449  | -0.680343636 |
| 6 | 1.676959167  | 1.799360961  | 3.153726464  |
| 1 | 5.699391825  | 0.956984320  | 0.999005396  |
| 1 | 4.054872122  | 0.340818835  | 3.160979420  |
| 6 | 5.576618194  | 4.015620389  | -0.377965591 |
| 1 | 5.063426496  | 2.112491363  | -1.259681718 |
| 1 | 3.744435179  | 3.275376064  | -1.238975970 |
| 1 | 1.890369123  | 2.417657791  | 4.017193527  |
| 1 | 0.805553090  | 2.202055555  | 2.655662154  |
| 1 | 1.492999962  | 0.777985348  | 3.464322812  |
| 1 | 5.934695648  | 4.436334416  | -1.314891717 |
| 1 | 6.438818947  | 3.649526488  | 0.176028208  |
| 1 | 5.102010894  | 4.812357260  | 0.190727286  |
| 5 | 1.989891345  | -2.163403025 | 4.587863427  |
| 9 | 1.810717835  | -3.524194651 | 4.222601376  |
| 9 | 2.138539817  | -2.025784163 | 5.957560910  |
| 9 | 3.141112186  | -1.672232037 | 3.903813164  |
| 9 | 0.859627480  | -1.425623348 | 4.134359096  |
| 6 | 3.459070902  | -3.890286652 | 1.702025616  |
| 7 | 4.495518086  | -3.411445849 | 1.012163076  |
| 7 | 2.593035911  | -4.418561617 | 0.835192784  |
| 6 | 4.292436083  | -3.650400281 | -0.331835982 |
| 6 | 3.094742521  | -4.278534226 | -0.443033188 |
| 1 | 3.306188843  | -3.819263101 | 2.763650329  |
| 6 | 5.656974897  | -2.731914511 | 1.599974112  |
| 6 | 1.323094700  | -5.039177631 | 1.190923236  |
| 1 | 4.996027613  | -3.312708153 | -1.070302458 |
| 1 | 2.525131823  | -4.585050802 | -1.299820664 |
| 6 | 6.927639705  | -3.536939223 | 1.444782750  |
| 1 | 5.750320494  | -1.772816927 | 1.102062914  |
| 1 | 5.410065973  | -2.553668071 | 2.642436475  |
| 1 | 0.547385476  | -4.628495582 | 0.556406578  |
| 1 | 1.388825156  | -6.113807737 | 1.043117977  |
| 1 | 1.114239965  | -4.820492275 | 2.231377139  |
| 1 | 7.748263065  | -2.996896108 | 1.911380270  |
| 1 | 7.181420498  | -3.669746208 | 0.396569018  |
| 1 | 6.843707944  | -4.512591943 | 1.920491982  |
| 5 | 1.025301791  | 4.428434250  | -1.517343793 |
| 9 | 1.928268396  | 3.983345207  | -2.487923894 |
| 9 | 1.717390124  | 5.091407171  | -0.464764265 |
| 9 | 0.066126232  | 5.285039964  | -2.061696385 |
| 9 | 0.370870277  | 3.296064486  | -0.935856945 |
| 6 | -1.183895376 | 5.891226309  | 0.904638837  |
| 7 | -2.398983333 | 5.431580791  | 0.609923125  |
| 7 | -1.306487509 | 6.823061443  | 1.852940210  |
| 6 | -3.320657264 | 6.082911697  | 1.399207222  |

|   |              |             |              |
|---|--------------|-------------|--------------|
| 6 | -2.636164904 | 6.951365171 | 2.183017001  |
| 1 | -0.253293463 | 5.574151937 | 0.473678970  |
| 6 | -2.731173478 | 4.463934370 | -0.449066730 |
| 6 | -0.207575158 | 7.558861399 | 2.462277991  |
| 1 | -4.369635429 | 5.865665449 | 1.335088248  |
| 1 | -2.964354570 | 7.615067553 | 2.959225223  |
| 6 | -3.275106612 | 5.154334490 | -1.679486428 |
| 1 | -1.827037830 | 3.913532869 | -0.675078365 |
| 1 | -3.451381195 | 3.765926041 | -0.034273054 |
| 1 | -0.182532527 | 7.337633521 | 3.522135162  |
| 1 | 0.721753015  | 7.234844836 | 2.012378034  |
| 1 | -0.349131972 | 8.622370761 | 2.289920759  |
| 1 | -3.543475837 | 4.402529150 | -2.415513639 |
| 1 | -2.525925059 | 5.810343995 | -2.113710159 |
| 1 | -4.169139181 | 5.733516550 | -1.451663245 |



---

## References

<sup>1</sup> Johnson C.J., Fournier J.A., Wolke C.T., Johnson M.A. Ionic liquids from the bottom up: Local assembly motifs in [Emim][BF<sub>4</sub>] through cryogenic ion spectroscopy. *J. Chem. Phys.* **2013**, *139*, 224305.
